# Supplementary material for: 2-Aminopyrimidine Derivatives as New Selective Fibroblast Growth Factor Receptor 4 (FGFR4) Inhibitors
Source: Atypon-hosted journal article supplement (doi:10.1021/acsmedchemlett.7b00091), 2017-03-31
Supplement: ml7b00091_si_001.pdf [file ml7b00091_si_001.pdf]

Hypothesis annotation for pubs.acs.org


Loading annotation for pubs.acs.org
